# Supplementary material for: The Effects ofBifidobacterium breveon Immune Mediators and Proteome of HT29 Cells Monolayers
Source: Hindawi journal article supplement (doi:10.1155/2015/479140), 2015-01-01

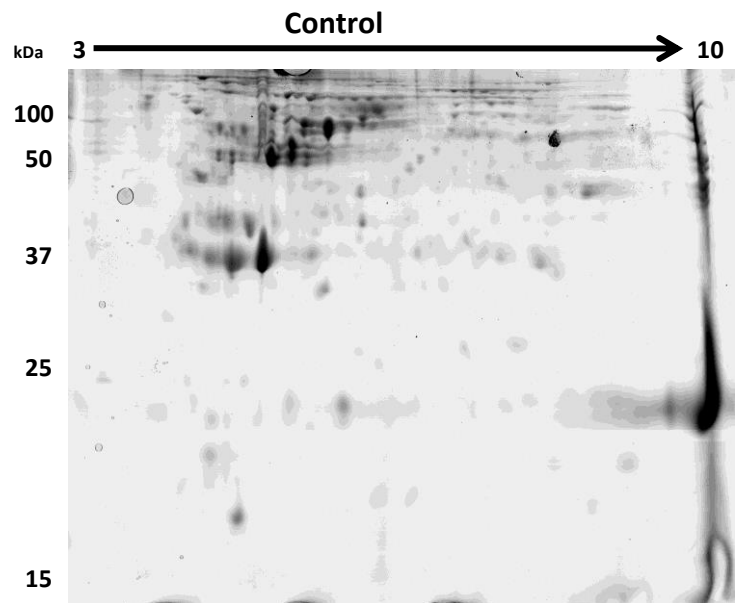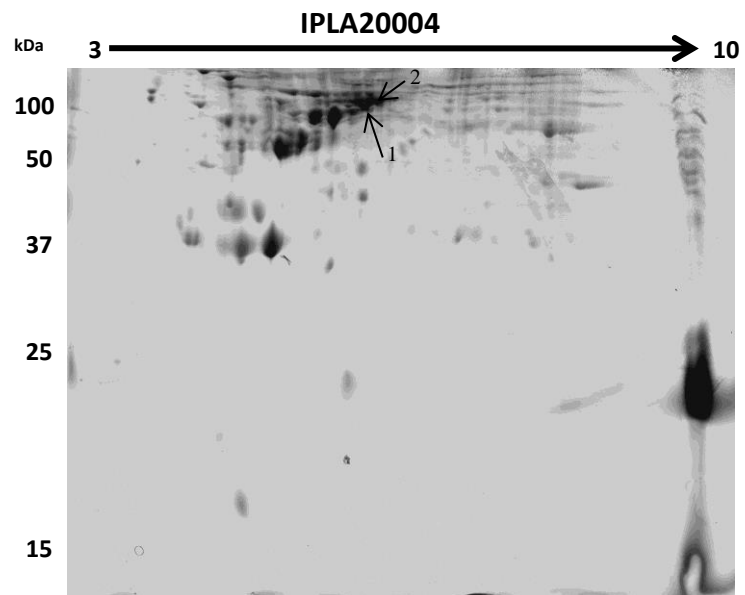

Supplement: f1 [file 479140.f1.pdf]
